# Supplementary material for: Seasonal Changes in Socio-Spatial Structure in a Group of Free-Living Spider Monkeys (Ateles geoffroyi)
Source: PLOS journal article supplement (doi:10.1371/journal.pone.0157228), 2016-06-09
Supplement: S2 (10.1371/journal.pone.0157228.s002) [file journal.pone.0157228.s002]

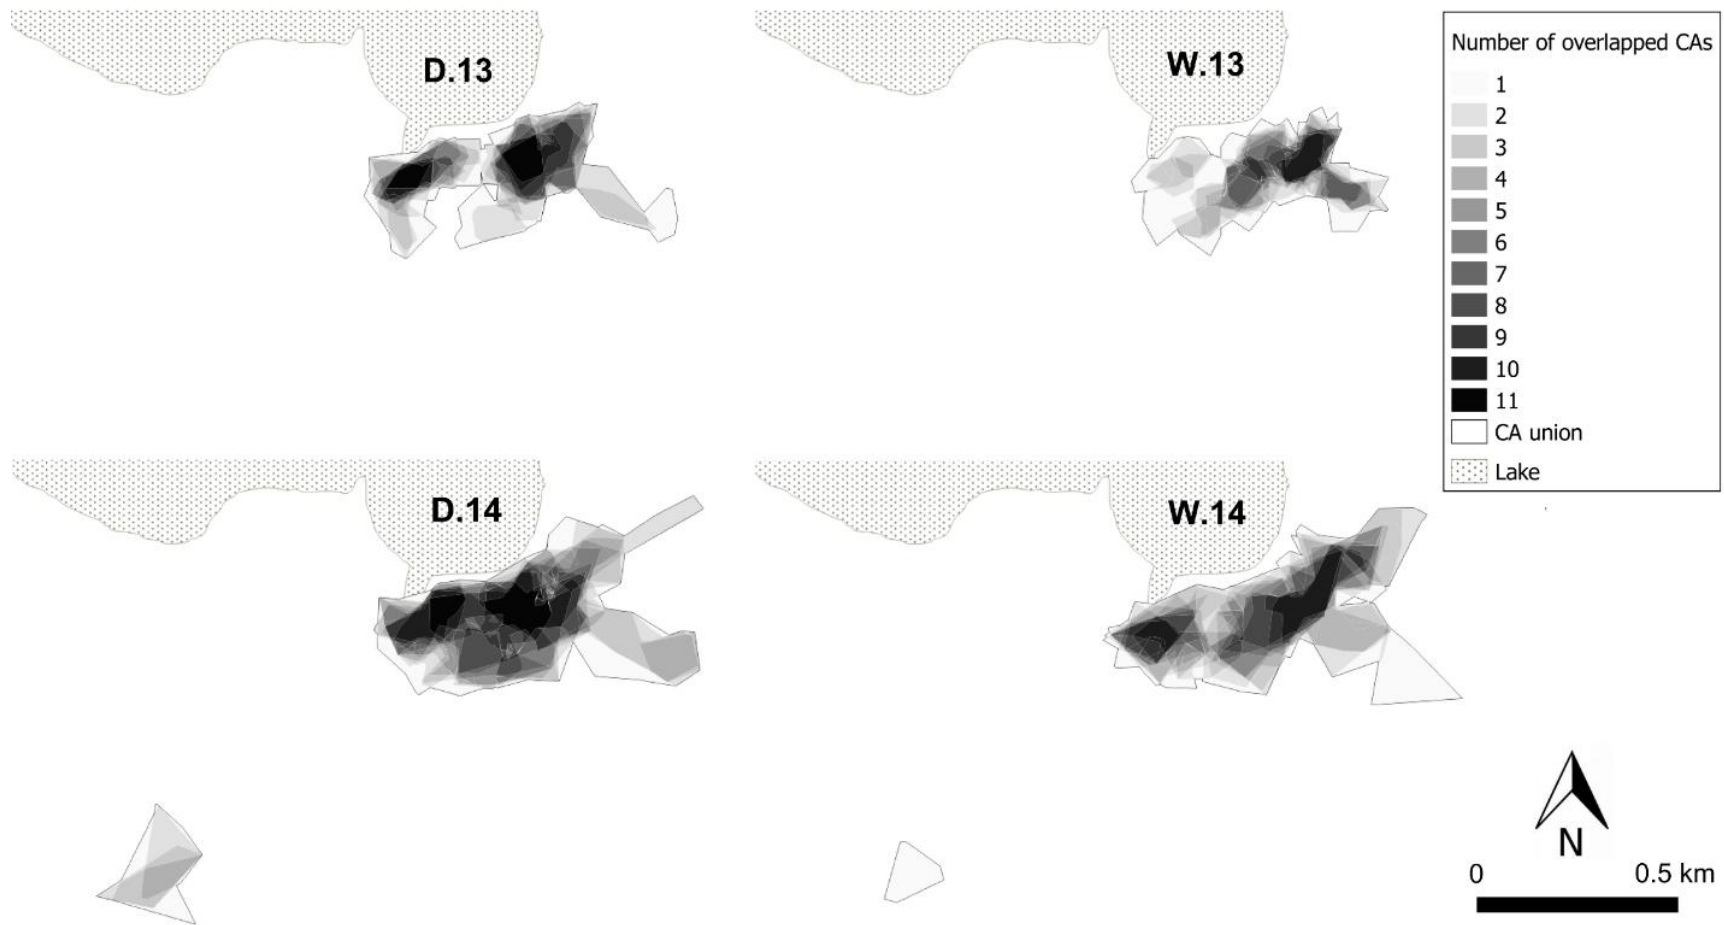

**S2 Fig. Seasonal overlap of individual core areas.** As more core areas (CAs) overlap in one place within the core area union (CA union; dark gray border), the color becomes darker while areas where few core areas coincided are shown in pale grey tones. The dotted area represents a lake that borders the group's home range (D.13: dry 2013, W.13: wet 2013, D.14: dry 2014 & W.14: wet 2014).
